# Supplementary material for: One-step syntheses of MoS2/graphitic carbon composites with enhanced photocatalytic activity under visible light irradiation
Source: Royal Society of Chemistry journal article supplement (doi:10.1039/c7nj02507f), 2017-01-01
Supplement: c7nj02507f1.pdf [file c7nj02507f1.pdf]

## Electronic Supplementary Information

### One-step Syntheses of MoS<sub>2</sub>/Graphitic Carbon Composites with Enhanced Photocatalytic Activity under Visible Light Irradiation

Hongye Bai, Weiqiang Fan, Yilin Ge, Peng Guan, and Weidong Shi\*

School of Chemistry and Chemical Engineering, Jiangsu University,

Zhenjiang, 212013, P. R.China

\*Corresponding author e-mail: swd1978@ujs.edu.cn

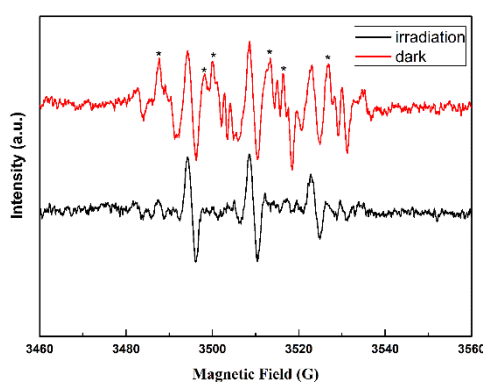

Fig.S1 The ESR signals of DMPO-O<sub>2</sub> of MoS<sub>2</sub>/C (2:1) under visible light irradiation. Some peaks existing both in dark and irradiation are signals from the oxidation of DMPO because of improper storage.
